# Supplementary material
Source: PubMed Central journal article supplement (PMC5970974)
Supplement: jamainternmed-178-640-s001.pdf [file jamainternmed-178-640-s001.pdf]

## Supplementary Online Content

Maust DT, Kim HM, Chiang C, Kales HC. Association of the Centers for Medicare & Medicaid Services' National Partnership to Improve Dementia Care with use of antipsychotics and other psychotropics in long-term care in the United States from 2009 to 2014. *JAMA Intern Med*. Published online March 17, 2018. doi:10.1001/jamainternmed.2018.0379

**eTable 1.** *International Classification of Diseases, Ninth Revision, Clinical Modification (ICD-9-CM) Codes for Antipsychotic Use Denominator Exclusion and Dementia and Seizure Disorder Subanalyses*

**eTable 2.** Psychotropic Medication Classes

**eTable 3.** Percentage of Long-term Stay Nursing Home Residents Prescribed an Antipsychotic or Other Psychotropic Medication (used for Figure 1)

**eTable 4.** Rates and Trends of Antipsychotic and Other Psychotropic Use per 100 Long-Stay Nursing Home Residents with No Hospitalization in Study Period (N=449 205)

**eTable 5.** Rates and Trends of Antipsychotic and Other Psychotropic Use per 100 Long-Stay Nursing Home Residents Censored 180 days Prior to Death (N=583 169)

**eTable 6.** Percentage of Long-term Stay Nursing Home Residents with Dementia Prescribed an Antipsychotic or Other Psychotropic Medication (used for Figure 2)

This supplementary material has been provided by the authors to give readers additional information about their work.

**eTable 1.** *International Classification of Diseases, Ninth Revision, Clinical Modification (ICD-9-CM) Codes for Antipsychotic Use Denominator Exclusion and Dementia and Seizure Disorder Subanalyses*

| <b>Condition</b>     | <b>ICD-9-CM code</b>                                                                                  |
|----------------------|-------------------------------------------------------------------------------------------------------|
| Schizophrenia        | 295.x                                                                                                 |
| Tourette's syndrome  | 307.23                                                                                                |
| Huntington's disease | 333.4                                                                                                 |
| Dementia             | 046.1x, 046.3x, 290.0, 290.1x, 290.2x, 290.3, 290.4x, 291.2, 294.10, 294.11, 331.0, 331.1, and 331.82 |
| Seizure disorder     | 345.x                                                                                                 |

**eTable 2. Psychotropic Medication Classes**

|                                   |                                                                                                                                                                                                                                                                                                                                                                              |
|-----------------------------------|------------------------------------------------------------------------------------------------------------------------------------------------------------------------------------------------------------------------------------------------------------------------------------------------------------------------------------------------------------------------------|
| Antidepressant                    | amitriptyline, amoxapine, atomoxetine, bupropion, citalopram, clomipramine, desipramine, doxepin, duloxetine, escitalopram, fluoxetine, fluvoxamine, imipramine, isocarboxazid, levomilnacipran, maprotiline, mirtazapine, nefazodone, nortriptyline, paroxetine, phenelzine, protriptyline, sertraline, tranylcypromine, trazodone, trimipramine, venlafaxine, vortioxetine |
| Anxiolytic/<br>Sedative-hypnotic  | buspirone, chloral hydrate, eszopiclone, zaleplon, zolpidem, ramelteon                                                                                                                                                                                                                                                                                                       |
| Anticonvulsant/mood<br>stabilizer | carbamazepine, divalproex, felbamate, gabapentin, lamotrigine, lithium, oxcarbazepine, topiramate, valproic acid (also divalproex), sodium valproate                                                                                                                                                                                                                         |
| Antipsychotic                     | <i>conventional:</i> chlorpromazine, fluphenazine, haloperidol, loxapine, mesoridazine, molindone, perphenazine, pimozide, thioridazine, thiothixene, trifluoperazine<br><i>atypical:</i> aripiprazole, clozapine, lurasidone, olanzapine, paliperidone, quetiapine, risperidone, ziprasidone                                                                                |
| Benzodiazepine                    | alprazolam, chlordiazepoxide, clonazepam, clorazepate, diazepam, estazolam, flurazepam, halazepam, lorazepam, midazolam, oxazepam, prazepam, quazepam, temazepam, triazolam                                                                                                                                                                                                  |
| Memory medications                | donepezil, rivastigmine, galantamine, memantine                                                                                                                                                                                                                                                                                                                              |

**eTable 3.** Percentage of Long-term Stay Nursing Home Residents Prescribed an Antipsychotic or Other Psychotropic Medication (used for Figure 1)

| Quarter              | Medication class, % |                |                 |                                            |                                        |                                 |                  |        |
|----------------------|---------------------|----------------|-----------------|--------------------------------------------|----------------------------------------|---------------------------------|------------------|--------|
|                      | Antipsychotics      | Antidepressant | Mood stabilizer | Sedative-hypnotics (non-BZD <sup>a</sup> ) | Non-AP psychotropics overall (non-BZD) | Psychotropics overall (non-BZD) | BZD              | Memory |
| 2009_Q1              | 21.3                | 52.0           | 16.6            | 8.1                                        | 60.1                                   | 64.9                            | n/a <sup>b</sup> | 28.4   |
| 2009_Q2              | 20.7                | 51.8           | 16.8            | 8.6                                        | 60.2                                   | 64.8                            | n/a              | 27.7   |
| 2009_Q3              | 19.9                | 50.7           | 16.9            | 8.5                                        | 59.4                                   | 63.8                            | n/a              | 26.7   |
| 2009_Q4              | 19.1                | 49.8           | 16.8            | 8.4                                        | 58.5                                   | 62.7                            | n/a              | 25.7   |
| 2010_Q1              | 18.3                | 49.3           | 16.7            | 8.4                                        | 58.0                                   | 62.1                            | n/a              | 24.9   |
| 2010_Q2              | 17.7                | 48.7           | 16.9            | 8.3                                        | 57.6                                   | 61.6                            | n/a              | 24.3   |
| 2010_Q3              | 17.2                | 48.1           | 17.0            | 8.3                                        | 57.1                                   | 60.9                            | n/a              | 23.6   |
| 2010_Q4              | 16.8                | 47.6           | 17.0            | 8.2                                        | 56.6                                   | 60.3                            | n/a              | 22.8   |
| 2011_Q1              | 16.4                | 47.3           | 17.1            | 8.3                                        | 56.4                                   | 59.9                            | n/a              | 22.2   |
| 2011_Q2              | 16.0                | 47.2           | 17.2            | 8.3                                        | 56.3                                   | 59.7                            | n/a              | 21.6   |
| 2011_Q3              | 15.7                | 46.9           | 17.4            | 8.3                                        | 56.2                                   | 59.5                            | n/a              | 21.0   |
| 2011_Q4              | 15.3                | 46.4           | 17.5            | 8.3                                        | 55.7                                   | 59.0                            | n/a              | 20.4   |
| 2012_Q1              | 15.0                | 46.0           | 17.6            | 8.3                                        | 55.5                                   | 58.7                            | n/a              | 20.0   |
| 2012_Q2 <sup>c</sup> | 14.6                | 45.7           | 17.9            | 8.1                                        | 55.3                                   | 58.4                            | n/a              | 19.4   |
| 2012_Q3              | 14.3                | 45.3           | 18.1            | 8.0                                        | 55.0                                   | 57.9                            | n/a              | 18.9   |
| 2012_Q4              | 13.7                | 44.9           | 18.2            | 7.9                                        | 54.6                                   | 57.5                            | n/a              | 18.4   |
| 2013_Q1              | 13.2                | 44.6           | 18.2            | 7.8                                        | 54.4                                   | 57.1                            | 19.4             | 18.0   |
| 2013_Q2              | 12.8                | 44.5           | 18.6            | 7.7                                        | 54.4                                   | 57.0                            | 20.2             | 17.6   |
| 2013_Q3              | 12.5                | 44.3           | 18.9            | 7.3                                        | 54.2                                   | 56.7                            | 20.1             | 17.3   |
| 2013_Q4              | 12.2                | 44.1           | 19.1            | 7.1                                        | 54.0                                   | 56.4                            | 20.0             | 17.0   |
| 2014_Q1              | 12.0                | 43.8           | 19.2            | 7.1                                        | 53.8                                   | 56.1                            | 20.2             | 16.7   |
| 2014_Q2              | 11.7                | 43.6           | 19.4            | 6.8                                        | 53.6                                   | 55.9                            | 19.9             | 16.4   |
| 2014_Q3              | 11.5                | 43.4           | 19.6            | 6.5                                        | 53.3                                   | 55.6                            | 19.9             | 16.0   |
| 2014_Q4              | 11.5                | 43.9           | 20.1            | 6.4                                        | 53.9                                   | 56.1 <sup>d</sup>               | 19.9             | 15.8   |

<sup>a</sup> BZD: benzodiazepine

<sup>b</sup> Medicare Part D coverage did not include BZD until 2013

<sup>c</sup> Start of CMSNP

<sup>d</sup> When including benzodiazepines, psychotropic prevalence overall is 60.4%

**eTable 4.** Rates and Trends of Antipsychotic and Other Psychotropic Use per 100 Long-Stay Nursing Home Residents with No Hospitalization in Study Period (N=449 205)

| Medication                                        | Period 1 (2009–2012Q1) |       |                |         | Period 2 (2012Q2–2014) |       |                |         |              |                |         |
|---------------------------------------------------|------------------------|-------|----------------|---------|------------------------|-------|----------------|---------|--------------|----------------|---------|
|                                                   | Use, % <sup>a</sup>    | Slope | 95% CI         | P Value | Use, % <sup>a</sup>    | Slope | 95% CI         | P Value | Slope change | 95% CI         | P Value |
| Antipsychotics                                    | 22.0                   | -0.63 | (-0.74, -0.52) | <.001   | 14.2                   | -0.27 | (-0.37, -0.17) | <.001   | 0.36         | ( 0.19, 0.52)  | <.001   |
| Antidepressant                                    | 51.6                   | -0.57 | (-0.68, -0.46) | <.001   | 44.7                   | -0.09 | (-0.21, 0.03)  | .140    | 0.48         | ( 0.29, 0.66)  | <.001   |
| Mood stabilizer                                   | 16.5                   | 0.09  | ( 0.06, 0.12)  | <.001   | 17.8                   | 0.22  | ( 0.18, 0.26)  | <.001   | 0.13         | ( 0.08, 0.18)  | <.001   |
| Sedative-hypnotics (non-BZD)                      | 7.3                    | 0.05  | ( 0.02, 0.08)  | <.001   | 8.0                    | -0.17 | (-0.20, -0.14) | <.001   | -0.22        | (-0.26, -0.17) | <.001   |
| Non-antipsychotic psychotropics overall (non-BZD) | 59.8                   | -0.46 | (-0.56, -0.35) | <.001   | 54.3                   | -0.05 | (-0.17, 0.06)  | .347    | 0.40         | ( 0.23, 0.58)  | <.001   |
| Psychotropics overall (non-BZD)                   | 64.9                   | -0.63 | (-0.76, -0.51) | <.001   | 57.2                   | -0.12 | (-0.26, 0.02)  | .091    | 0.51         | ( 0.31, 0.72)  | <.001   |
| BZD                                               | n/a <sup>b</sup>       | n/a   | n/a            | n/a     | 18.9                   | 0.05  | (-0.04, 0.13)  | .206    | n/a          | n/a            | n/a     |
| Memory                                            | 28.1                   | -0.80 | (-0.91, -0.69) | <.001   | 18.1                   | -0.23 | (-0.33, -0.13) | <.001   | 0.57         | ( 0.39, 0.75)  | <.001   |

CI: confidence interval; BZD: benzodiazepine

<sup>a</sup> During first quarter of the period.

<sup>b</sup> Medicare did not cover BZD until 2013

**eTable 5.** Rates and Trends of Antipsychotic and Other Psychotropic Use per 100 Long-Stay Nursing Home Residents Censored 180 days Prior to Death (N=583 169)

| Medication                                        | Period 1 (2009–2012Q1) |       |                |         | Period 2 (2012Q2–2014) |       |                |         |              |                |         |
|---------------------------------------------------|------------------------|-------|----------------|---------|------------------------|-------|----------------|---------|--------------|----------------|---------|
|                                                   | Use, % <sup>a</sup>    | Slope | 95% CI         | P Value | Use, % <sup>a</sup>    | Slope | 95% CI         | P Value | Slope change | 95% CI         | P Value |
| Antipsychotics                                    | 21.0                   | -0.56 | (-0.67, -0.44) | <.001   | 14.0                   | -0.24 | (-0.36, -0.13) | <.001   | 0.32         | ( 0.14, 0.50)  | .001    |
| Antidepressant                                    | 51.7                   | -0.52 | (-0.62, -0.43) | <.001   | 45.2                   | -0.12 | (-0.25, 0.01)  | .062    | 0.40         | ( 0.22, 0.58)  | <.001   |
| Mood stabilizer                                   | 16.6                   | 0.08  | ( 0.06, 0.11)  | <.001   | 17.9                   | 0.22  | ( 0.19, 0.26)  | <.001   | 0.14         | ( 0.09, 0.18)  | <.001   |
| Sedative-hypnotics (non-BZD)                      | 8.1                    | 0.004 | (-0.02, 0.03)  | .765    | 8.2                    | -0.18 | (-0.22, -0.15) | <.001   | -0.19        | (-0.23, -0.14) | <.001   |
| Non-antipsychotic psychotropics overall (non-BZD) | 59.8                   | -0.41 | (-0.49, -0.32) | <.001   | 55.0                   | -0.10 | (-0.23, 0.02)  | .095    | 0.30         | ( 0.14, 0.47)  | .001    |
| Psychotropics overall (non-BZD)                   | 64.6                   | -0.56 | (-0.66, -0.45) | <.001   | 57.8                   | -0.16 | (-0.29, -0.03) | .018    | 0.39         | ( 0.21, 0.57)  | <.001   |
| BZD                                               | n/a <sup>b</sup>       | n/a   | n/a            | n/a     | 19.0                   | 0.05  | (-0.02, 0.12)  | .120    | n/a          | n/a            | n/a     |
| Memory                                            | 28.1                   | -0.73 | (-0.80, -0.67) | <.001   | 19.0                   | -0.32 | (-0.39, -0.24) | <.001   | 0.42         | ( 0.31, 0.53)  | <.001   |

CI: confidence interval; BZD: benzodiazepine

<sup>a</sup> During first quarter of the period.

<sup>b</sup> Medicare did not cover BZD until 2013

**eTable 6.** Percentage of Long-term Stay Nursing Home Residents with Dementia Prescribed an Antipsychotic or Other Psychotropic Medication (used for Figure 2)

| Quarter              | Medication class, % |                |                 |                                            |                                                   |                                 |                  |        |
|----------------------|---------------------|----------------|-----------------|--------------------------------------------|---------------------------------------------------|---------------------------------|------------------|--------|
|                      | Antipsychotics      | Antidepressant | Mood stabilizer | Sedative-hypnotics (non-BZD <sup>a</sup> ) | Non-antipsychotic psychotropics overall (non-BZD) | Psychotropics overall (non-BZD) | BZD              | Memory |
| 2009_Q1              | 29.9                | 57.6           | 16.3            | 7.0                                        | 64.2                                              | 71.2                            | n/a <sup>b</sup> | 45.6   |
| 2009_Q2              | 29.5                | 57.8           | 16.5            | 7.4                                        | 64.6                                              | 71.4                            | n/a              | 45.4   |
| 2009_Q3              | 28.8                | 57.1           | 16.6            | 7.4                                        | 64.1                                              | 70.8                            | n/a              | 44.7   |
| 2009_Q4              | 28.0                | 56.7           | 16.6            | 7.2                                        | 63.7                                              | 70.2                            | n/a              | 44.1   |
| 2010_Q1              | 27.5                | 56.5           | 16.6            | 7.1                                        | 63.5                                              | 69.9                            | n/a              | 43.8   |
| 2010_Q2              | 27.1                | 56.4           | 16.7            | 7.0                                        | 63.4                                              | 69.7                            | n/a              | 43.6   |
| 2010_Q3              | 26.7                | 56.1           | 16.8            | 7.0                                        | 63.1                                              | 69.4                            | n/a              | 43.2   |
| 2010_Q4              | 26.4                | 55.9           | 16.9            | 7.0                                        | 63.0                                              | 69.1                            | n/a              | 42.5   |
| 2011_Q1              | 26.1                | 55.9           | 17.0            | 7.0                                        | 62.9                                              | 68.9                            | n/a              | 42.3   |
| 2011_Q2              | 25.9                | 56.2           | 17.1            | 7.0                                        | 63.2                                              | 69.0                            | n/a              | 42.1   |
| 2011_Q3              | 25.8                | 56.1           | 17.4            | 7.0                                        | 63.2                                              | 69.0                            | n/a              | 41.6   |
| 2011_Q4              | 25.3                | 55.8           | 17.5            | 7.0                                        | 63.0                                              | 68.6                            | n/a              | 41.0   |
| 2012_Q1              | 25.1                | 55.7           | 17.6            | 7.0                                        | 63.0                                              | 68.6                            | n/a              | 40.7   |
| 2012_Q2 <sup>c</sup> | 24.8                | 55.7           | 17.8            | 7.0                                        | 63.0                                              | 68.4                            | n/a              | 40.2   |
| 2012_Q3              | 24.3                | 55.2           | 18.1            | 6.8                                        | 62.7                                              | 68.0                            | n/a              | 40.0   |
| 2012_Q4              | 23.5                | 55.1           | 18.3            | 6.7                                        | 62.5                                              | 67.6                            | n/a              | 39.5   |
| 2013_Q1              | 22.8                | 55.0           | 18.3            | 6.7                                        | 62.4                                              | 67.5                            | 20.7             | 39.4   |
| 2013_Q2              | 22.5                | 55.0           | 18.6            | 6.7                                        | 62.6                                              | 67.5                            | 21.7             | 39.3   |
| 2013_Q3              | 22.1                | 54.9           | 19.0            | 6.3                                        | 62.5                                              | 67.3                            | 21.5             | 39.0   |
| 2013_Q4              | 21.7                | 54.8           | 19.3            | 6.1                                        | 62.4                                              | 67.1                            | 21.5             | 38.8   |
| 2014_Q1              | 21.4                | 54.8           | 19.5            | 6.0                                        | 62.3                                              | 66.9                            | 21.7             | 38.6   |
| 2014_Q2              | 21.0                | 54.5           | 19.6            | 5.9                                        | 62.1                                              | 66.6                            | 21.4             | 38.4   |
| 2014_Q3              | 20.7                | 54.2           | 19.8            | 5.7                                        | 61.7                                              | 66.1                            | 21.6             | 37.9   |
| 2014_Q4              | 20.5                | 54.5           | 20.3            | 5.5                                        | 62.1                                              | 66.4 <sup>d</sup>               | 21.5             | 37.3   |

<sup>a</sup> BZD: benzodiazepine

<sup>b</sup> Medicare Part D coverage did not include BZD until 2013

<sup>c</sup> Start of CMSNP

<sup>d</sup> When including benzodiazepines, psychotropic prevalence overall is 69.5%
